# Supplementary material for: Surface group mediates the adsorption of in situ generated thrombin and its interaction with anti-thrombin in the protein corona of SBA-15
Source: Royal Society of Chemistry journal article supplement (doi:10.1039/c4ra02106a), 2014-01-01
Supplement: c4ra02106a1.pdf [file c4ra02106a1.pdf]

## Supporting information

### **Experimental Section**

**Synthesis and modification of SBA-15.** In a typical synthesis, 1.6g (0.32m mol) of  $\text{EO}_{20}\text{PO}_{70}\text{EO}_{20}$  ( $\text{P}_{123}$ ) and 2.2g (30m mol)  $\text{KCl}$  were dissolved in 60g of 2.0M  $\text{HCl}$  at  $39\pm 1^\circ\text{C}$ . To this solution, 4.2g (20m mol) of (TEOS) tetraethyl orthosilicate was added under vigorous stirring. The final molar-composition of the reactants is 0.02  $\text{P}_{123}$ /1.5  $\text{KCl}$ /6  $\text{HCl}$ /166  $\text{H}_2\text{O}$ /1 TEOS. After stirring for 10 min, the mixture was kept in static conditions at the same temperature for one day, then the mixture was transferred into an autoclave and heat at  $40^\circ\text{C}$  for another 24h. The solid product were collected by filtration and dried at  $60^\circ\text{C}$  in air. The resulting powders were calcinated at  $350^\circ\text{C}$  to obtain mesoporous SBA-15.

For the synthesis of  $-\text{SH}$  / $-\text{NH}_2$  modified SBA-15, 0.01mol 3-mercaptopropyltrimethoxysilane or aminopropyltrimethoxysilane and 3.0g SBA-15 were added to 60ml toluene, the mixture was stirred at  $110^\circ\text{C}$  for 12h, then the solid was collected by filtration and dried at  $60^\circ\text{C}$  in air. For synthesis of SBA-15- $\text{COOH}$ , 3-Cyanopropyltrimethoxysilane was used to modifying the  $-\text{CN}$  group on the surface first, then the solid was added to 100ml 50%  $\text{H}_2\text{SO}_4$  and stirred at  $110^\circ\text{C}$  for 12h to hydrolyzed the  $-\text{CN}$  group.

**Determination of the Zeta-Potential** The zeta-potential of SBA-15 was determined with a Malvern Zetasizer Nano Series. The Zeta-potential measurements were conducted at  $25^\circ\text{C}$ . 5 mg of the materials were dispersed in 20 ml of 0.06%  $\text{KNO}_3$  solution.

**Fourier transform infrared spectroscopy** The FT-IR spectra of the samples were recorded on a Thermo Nicolet 380 spectrometer in the  $3600\text{--}400\text{ cm}^{-1}$  region via the KBr pellet method.

**Transmission electron microscopy** TEM images were recorded on a HT7700 operated at 100 Kv.

**Elemental analysis** Elemental analysis were performed with Vario MICROCHN elemental analyser (EA).

**BET Analysis** The BET specific surface area, average pore size, and pore volume of the SBA-15 were determined by N<sub>2</sub> adsorption/desorption isotherms at 77.15 K using a Micromeritics ASAP 2020 automatic surface area and porosity analyzer (Micromeritics Instrument Corp., Norcross, GA). The SBA-15 were outgassed for 3 h at 473.15 K on the degas port of the analyzer before test.

**Anti-coagulant plasma** Blood was taken from a healthy porcine. Sodium citrate (3.2%) was mixed with porcine blood in a ratio of 1:9 to prevent blood clotting. The whole blood was centrifuged at 4500 rpm for 8 min to separate the blood cells and platelets. The plasma was transferred to labeled tubes and stored at -20°C until used.

**Natural plasma** The 0.2M CaCl<sub>2</sub> was added to the anti-coagulant plasma in a ratio of 1:20 to get the natural plasma. The clotting time of natural plasma at 25 °C is around 11 min. Natural plasma was got just before use and was never refrozen.

**Plasma clot** Plasma clot was formed by incubated different volumes of natural plasma at 25 °C for 15min and the procoagulant activity of the plasma clot was also determined.

**HPC/SBA-15 composites.** The SBA-15 was incubated with plasma (natural plasma or anticoagulant plasma) in a ratio of 1:2 to 1:8. The incubation time is ~15 min, then the procoagulant activity and the thrombin activity of the composites was determined.

***In vitro* clotting assays.** An in vitro clotting assay was used to measure the procoagulant activity of the composite samples. The assay measured the coagulation response in terms of a clotting time (CT), defined as the time required from activation of the intrinsic pathway of the coagulation cascade to the appearance of a firm clot which stick to the wall of the polystyrene tube. The process had been extensively described in previous reports.<sup>[1-3]</sup> In a typical assay, 2.0 mL of porcine natural plasma was mixed with 50 mg of the hemostatic agent in a 5mL polystyrene tube (52mm×12mm). The assay tubes were capped with plastic caps, rotated at 30 rpm (~135°) on a mute mixer and the corresponding CT was recorded. The clotting assays were all carried at 25 °C.

**Thrombin chromogenic substrate assays.** The concentration of thrombin Chromogenic substrate S2238 (HYPHEN BioMed) was  $8 \times 10^{-4}$  M. The assay temperature was 37 °C. The procedure followed previous report.<sup>[2]</sup> The thrombin (Sigma-Aldrich) solution used in the thrombin chromogenic substrate assays had a concentration of 0.5~2 mg/mL.

**SDS-PAGE and Western blot analysis.** The HPC/SBA-15 composites (the SBA-15-SG was incubated with natural plasma or anticoagulant plasma in a ratio of 1:4) were washed with extensive water to remove the soft proteins with low affinity prior to the SDS-PAGE and Western blot experiments. The high-affinity proteins were retrieved from the SBA-15 surface by adding reducing SDS-sample buffer to the washed HPC/SBA-15 composites and boiling the solution. The proteins were then analyzed in 10% reducing SDS-PAGE. The protein bands were stained with coomassie brilliant blue. For western blot, samples were separated by 10% reducing SDS-PAGE and electroblotted onto a PVDF membrane. The membrane was then incubated for 2 h in TBS (containing 5~10% defatted milk). Afterward, the membrane was washed with de-ionized water and incubated with Rabbit polyclonal to Thrombin (Abcam, ab92621) for 12 h (over night). Then, the membrane was washed with TBST for three times and further incubated with secondary antibodies goat anti-rabbit IRDye 800CW for 2 h. After washing with TBST, densitometric band scanning was performed using an Odyssey infrared imaging system (LI-COR Biosciences).

**BSA (bovine serum albumin) absorbed to materials surface.** 20mg SBA-15 - COOH, SBA-15-NH<sub>2</sub> and SBA-15-OH materials were separately incubated with 200 µl 2.5mg/ml BSA solution for 10 minutes, then the solution was washed with extensive deionized water to remove the soft binding BSA prior to the SDS-PAGE. The hard protein corona was retrieved from the SBA-15 surface by adding reducing SDS-sample buffer to the SBA-15/BSA composites and boiling the solution. The proteins were then analyzed in 10% reducing SDS-PAGE. The protein bands were stained with coomassie brilliant blue.

Figure S1. The TEM of SBA-15-OH. TEM micrographs were obtained with a Hitachi HT-7700 transmission electron microscope operating at 100kV.

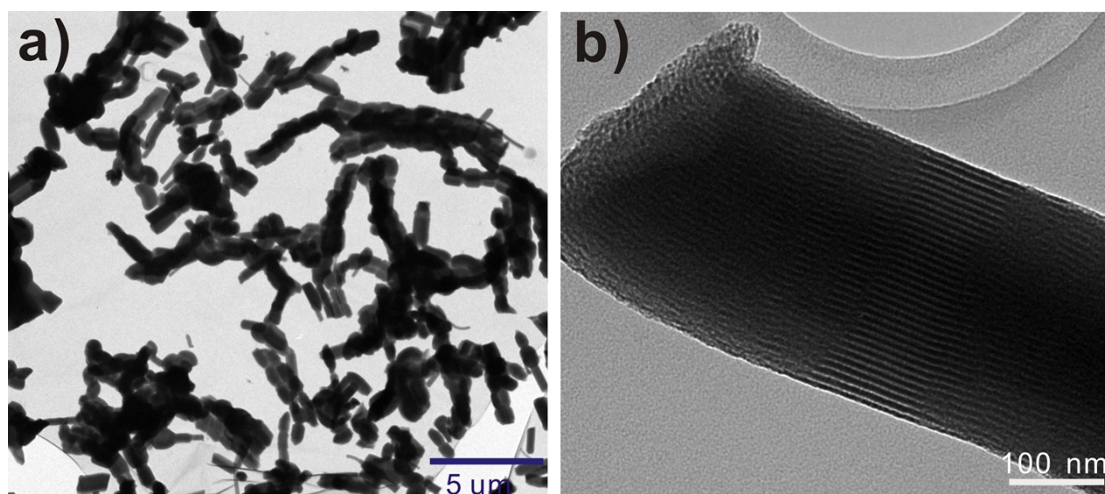

Table S1. The pore volume, surface area of -OH, -SH, -COOH and -NH<sub>2</sub> modified SBA-15.

| Surface group          | Surface area/(m <sup>2</sup> /g) | Pore<br>diameter/(nm) | Pore volume/(m <sup>3</sup> /g) |
|------------------------|----------------------------------|-----------------------|---------------------------------|
| SBA-15-OH              | 299                              | 5.0                   | 0.371                           |
| SBA-15-SH              | 293                              | 4.7                   | 0.346                           |
| SBA-15-COOH            | 275                              | 5.1                   | 0.356                           |
| SBA-15-NH <sub>2</sub> | 188                              | 4.7                   | 0.230                           |

Pore diameter, Pore volume and surface area were calculated from nitrogen sorption data based on BJH model from adsorption branch.

Figure S2. The FT-IR spectrum of group modified SBA-15. The presence of N-H bending vibration around  $687\text{ cm}^{-1}$  and C-H stretching around  $2940\text{ cm}^{-1}$  confirms the incorporation of amino groups. The presence of C=O stretching around  $1720\text{ cm}^{-1}$  confirms the incorporation of carboxyl groups.

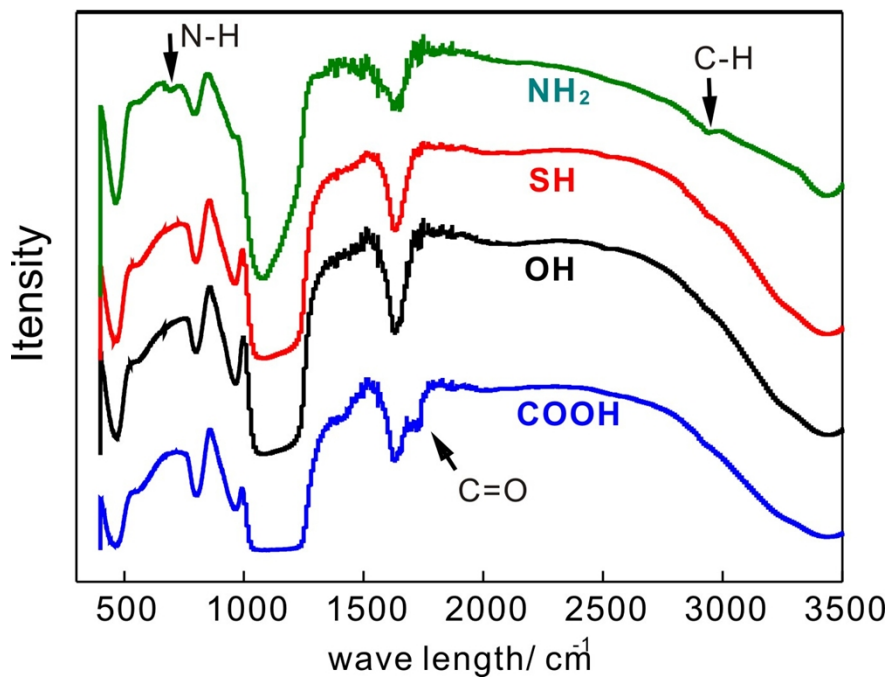

Table S2. The elemental analysis of SBA-15-SG (-SH, -COOH, -NH<sub>2</sub>)

| Sample                 | N/%  | C/%  | H/%  |
|------------------------|------|------|------|
| SBA-15-NH <sub>2</sub> | 2.49 | 9.16 | 2.67 |
| SBA-15-SH              | 0.00 | 5.98 | 1.77 |
| SBA-15-COOH            | 0.03 | 5.73 | 1.75 |
| SBA-15-OH              | 0.00 | 0.30 | 1.86 |

The high carbon content of SBA-15-SG (-SH, -COOH, -NH<sub>2</sub>) indicate that the - (CH<sub>2</sub>)<sub>3</sub>SH, -(CH<sub>2</sub>)<sub>2</sub>COOH and -(CH<sub>2</sub>)<sub>3</sub>NH<sub>2</sub> functional group are successfully attached to the silica surface.

Figure S3. The SDS-PAGE of HPC on the surface of SBA-15-SG. The protein corona is separately formed by incubating SBA-15-SG with natural plasma or anticoagulant plasma in a ratio of 1:4 (50 mg/200  $\mu$ l).

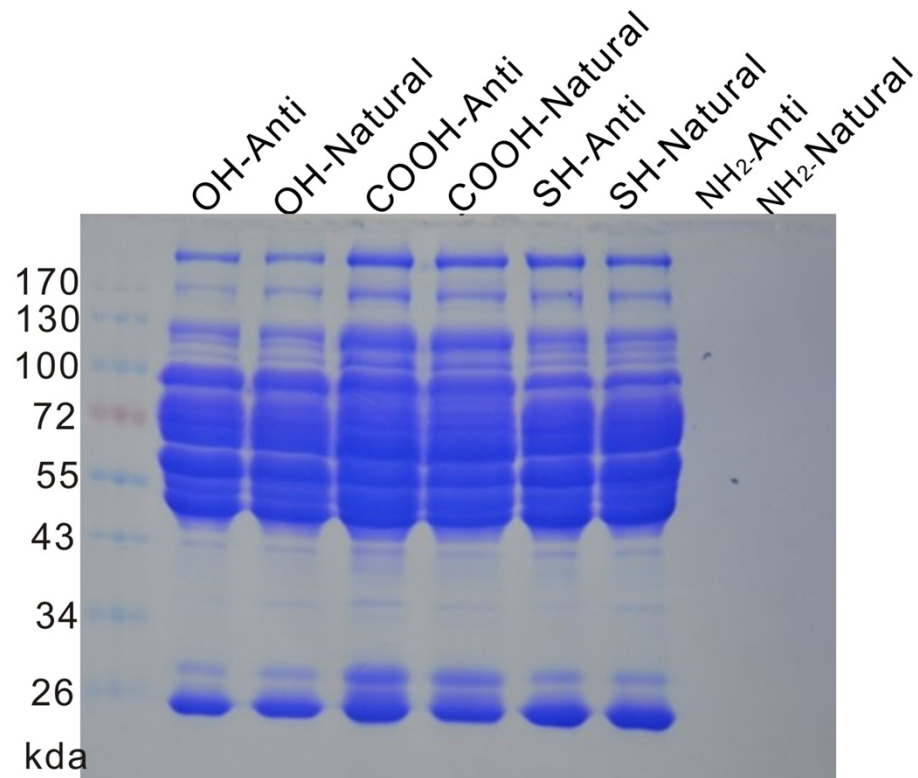



Figure S4. The clotting time of SBA-15-OH, natural plasma HPC/ SBA-15-OH (NP/SBA-15-OH) and anti-coagulant plasma HPC/ SBA-15-OH (ACP/ SBA-15-OH).

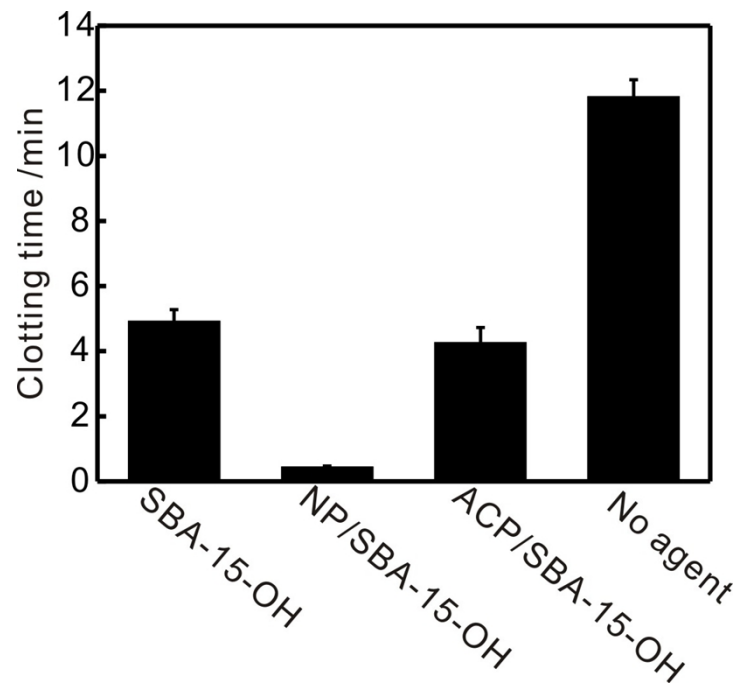

Figure S5. HPC formation on the surface of SBA-15-OH with different shapes, the rope-like SBA-15-OH was synthesized as Reference 12.

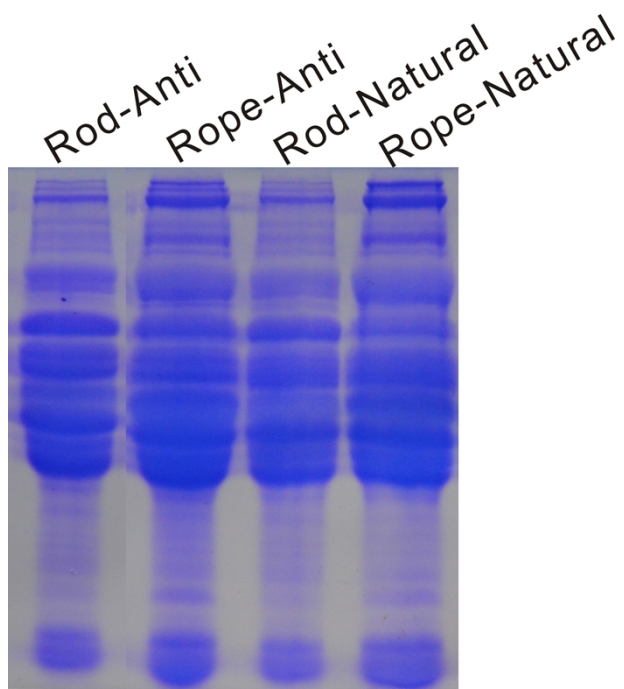

Figure S6. a) The TEM of rope-like SBA-15-OH. b) The procoagulant activity of SBA-15-OH with different shapes.

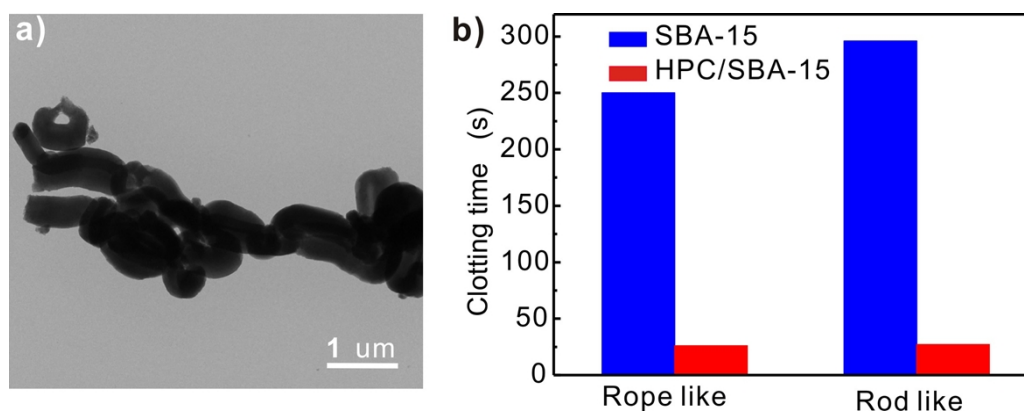

#### Reference:

- [1] T. A. Ostomel, P. K. Stoimenov, P. A. Holden, H. B. Alam, G. D. Stucky, *Journal of Thrombosis and Thrombolysis* **2006**, 22, 55.
- [2] S. E. Baker, A. M. Sawvel, J. Fan, Q. Shi, N. Strandwitz, G. D. Stucky, *Langmuir* **2008**, 24, 14254.
- [3] S. E. Baker, A. M. Sawvel, N. Zheng, G. D. Stucky, *Chemistry of Materials* **2007**, 19, 4390.
